# Supplementary material for: Phospholipid polymer hydrogels with rapid dissociation for reversible cell immobilization
Source: Royal Society of Chemistry journal article supplement (doi:10.1039/d1tb02316k), 2021-12-21
Supplement: d1tb02316k1.pdf [file d1tb02316k1.pdf]

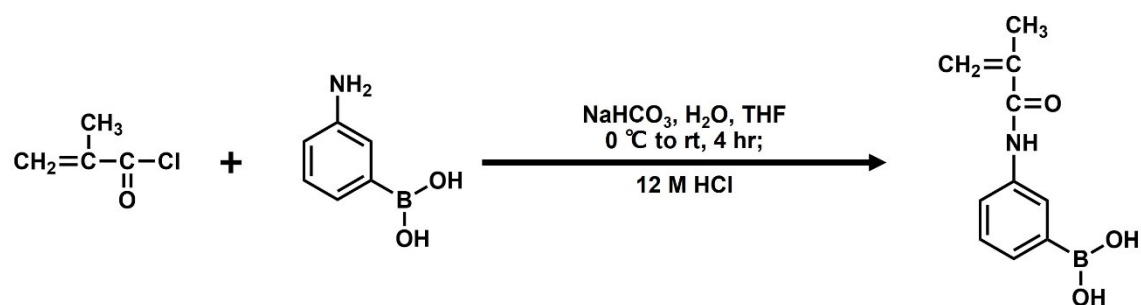

**Scheme S1.** Synthesis of 3-methacrylamidophenylboronic acid (MAPBA).

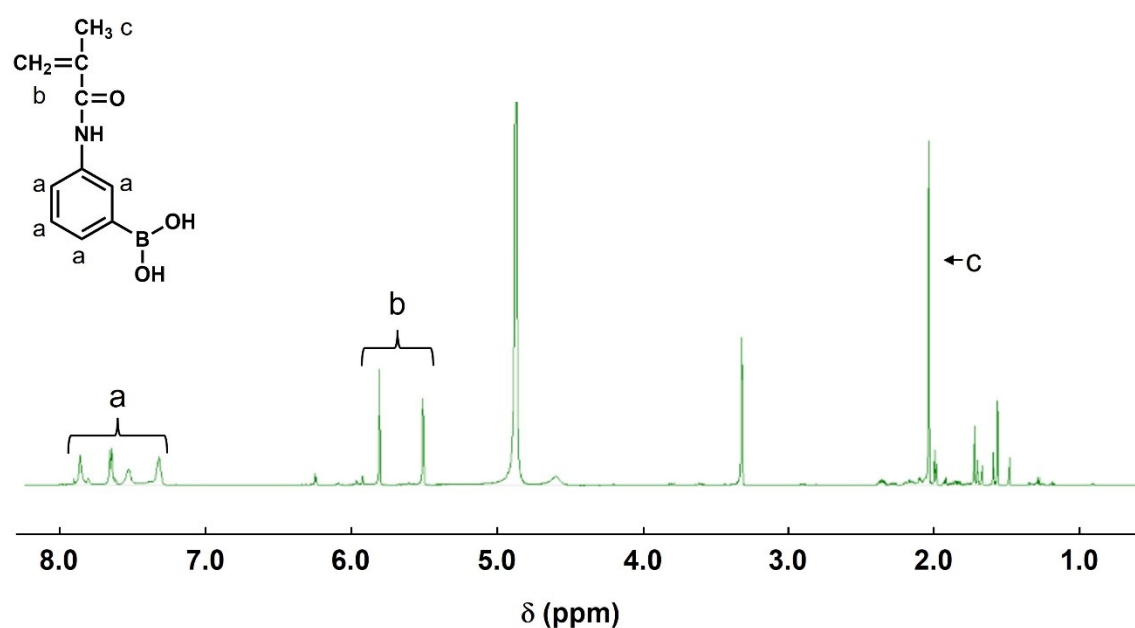

**Figure S1.**  $^1\text{H-NMR}$  spectrum of MAPBA in methanol- $d_4$ .

**Table S1.** pKa of PMB-MAPBA and PMB-VPBA aqueous solution

|           |      |
|-----------|------|
| PMB-MAPBA | 9.34 |
| PMB-VPBA  | 10.0 |
